# Supplementary material for: Directly predicting limiting potentials from easily obtainable physical properties of graphene-supported single-atom electrocatalysts by machine learning
Source: Royal Society of Chemistry journal article supplement (doi:10.1039/c9ta13404b), 2020-01-01
Supplement: c9ta13404b1.pdf [file c9ta13404b1.pdf]

Supporting Information

**Directly Predicting Limiting Potentials from Easily Obtainable Physical Properties of Graphene-Supported Single-Atom Electrocatalysts by Machine Learning**

Shiru Lin<sup>†</sup>, Haoxiang Xu<sup>‡,†</sup>, Yekun Wang<sup>§</sup>, Xiao Cheng Zeng,<sup>†</sup> Zhongfang Chen<sup>†\*</sup>

<sup>†</sup> Department of Chemistry, University of Puerto Rico, San Juan, PR 00931, USA

<sup>‡</sup> Beijing Advanced Innovation Center for Soft Matter Science and Engineering, Beijing University of Chemical Technology, Beijing, China

<sup>§</sup> Department of Mathematics, University of Puerto Rico, Rio Piedras, San Juan, PR 00931, USA

<sup>†</sup> Department of Chemistry, Department of Chemical & Biomolecular Engineering, and Department of Mechanical & Materials Engineering, University of Nebraska, Lincoln, NE, USA

\*Corresponding author E-mail: zhongfangchen@gmail.com (ZC)

**Data pretreatment.** For the pretreatment of data, the data were divided into training data and test data randomly with a ratio around 0.85 for training data. Therefore, 104 input data were split into 88 training set and 16 test set for ORR/HER models. For OER model, the small data set for M-N-pyrrole systems affect the training performance, thus, the small data set (with 26 data) was amplified three times with random noises. Totally, 156 input data were produced for OER model, which were divided into 135 training data and 21 validation data.

**DFT computations for catalysis performance.** The changes of Gibbs free energy ( $\Delta G$ ) for each elementary step along the ORR/OER were evaluated using the computational hydrogen electrode (CHE) model developed by Nørskov and co-workers.<sup>1</sup> The computed electronic energy was converted into Gibbs free energy by adding zero-point energy. The energy of the triplet O<sub>2</sub> molecule cannot be accurately computed by the DFT method<sup>2,3</sup> thus, its free energy was computed relative to the free energies of H<sub>2</sub>O(*l*) and H<sub>2</sub>(*g*). The chemical potential of the H<sup>+</sup>/e<sup>-</sup> pair is equal to half of the gas-phase H<sub>2</sub> at standard hydrogen electrode (SHE) conditions.

**Github website link.** The three well-trained models were uploaded to Github: [https://github.com/shirulin1026/ML\\_screening\\_ORROERHER](https://github.com/shirulin1026/ML_screening_ORROERHER), which is public now. The model files can be downloaded and employed for predictions through scikit-learn package. Training data and prediction data were also uploaded in the same folder on Github.

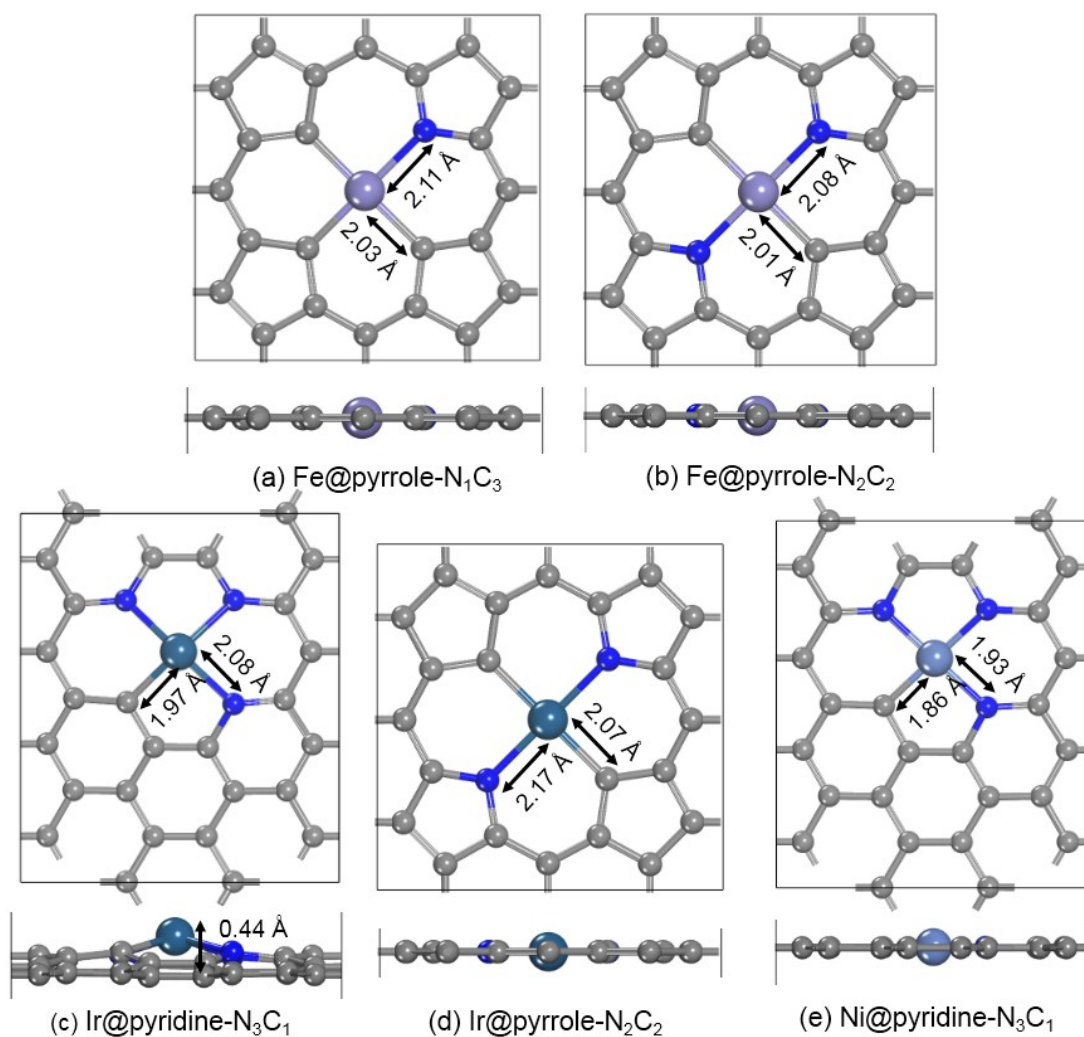

**Figure S1.** The geometries of ML-selected best SACs, (a, b) for ORR, (c, d) for OER, and (e) for HER.

**Table S1.** The structural compositions of 260 other graphene-supported SACs ( $M@N_xC_y$ ) and their limiting potentials towards ORR/OER/HER predicted by ML models.

| Num | Metal | Base                          | ORR   | OER  | HER   |
|-----|-------|-------------------------------|-------|------|-------|
| 1   | Sc    | C <sub>2</sub> N <sub>1</sub> | -2.19 | 3.78 | -2.16 |
| 2   | Ti    | C <sub>2</sub> N <sub>1</sub> | -1.85 | 3.25 | -1.90 |
| 3   | V     | C <sub>2</sub> N <sub>1</sub> | -1.31 | 3.00 | -1.35 |
| 4   | Cr    | C <sub>2</sub> N <sub>1</sub> | -0.98 | 3.05 | -0.83 |
| 5   | Mn    | C <sub>2</sub> N <sub>1</sub> | -0.99 | 2.80 | -0.96 |

| Num | Metal | Base                          | ORR   | OER  | HER   |
|-----|-------|-------------------------------|-------|------|-------|
| 6   | Fe    | C <sub>2</sub> N <sub>1</sub> | -0.53 | 3.14 | -0.55 |
| 7   | Co    | C <sub>2</sub> N <sub>1</sub> | -0.24 | 3.05 | -0.35 |
| 8   | Ni    | C <sub>2</sub> N <sub>1</sub> | -0.14 | 3.01 | -0.17 |
| 9   | Cu    | C <sub>2</sub> N <sub>1</sub> | 0.19  | 2.55 | 0.08  |
| 10  | Zn    | C <sub>2</sub> N <sub>1</sub> | 0.10  | 2.33 | 0.01  |
| 11  | Y     | C <sub>2</sub> N <sub>1</sub> | -2.18 | 3.61 | -2.03 |
| 12  | Zr    | C <sub>2</sub> N <sub>1</sub> | -1.77 | 3.17 | -1.72 |
| 13  | Nb    | C <sub>2</sub> N <sub>1</sub> | -1.36 | 3.26 | -1.42 |
| 14  | Mo    | C <sub>2</sub> N <sub>1</sub> | -0.76 | 3.48 | -0.75 |
| 15  | Tc    | C <sub>2</sub> N <sub>1</sub> | -0.52 | 3.35 | -0.41 |
| 16  | Ru    | C <sub>2</sub> N <sub>1</sub> | -0.17 | 2.83 | -0.09 |
| 17  | Rh    | C <sub>2</sub> N <sub>1</sub> | -0.01 | 2.62 | -0.04 |
| 18  | Pd    | C <sub>2</sub> N <sub>1</sub> | 0.28  | 2.58 | 0.34  |
| 19  | Cd    | C <sub>2</sub> N <sub>1</sub> | 0.19  | 2.27 | 0.20  |
| 20  | Hf    | C <sub>2</sub> N <sub>1</sub> | -1.86 | 3.39 | -1.83 |
| 21  | Ta    | C <sub>2</sub> N <sub>1</sub> | -1.65 | 3.24 | -1.66 |
| 22  | W     | C <sub>2</sub> N <sub>1</sub> | -0.93 | 3.16 | -1.16 |
| 23  | Re    | C <sub>2</sub> N <sub>1</sub> | -0.99 | 3.07 | -0.71 |
| 24  | Os    | C <sub>2</sub> N <sub>1</sub> | -0.32 | 3.42 | -0.39 |
| 25  | Ir    | C <sub>2</sub> N <sub>1</sub> | -0.17 | 3.05 | -0.11 |
| 26  | Pt    | C <sub>2</sub> N <sub>1</sub> | 0.17  | 2.68 | 0.07  |
| 27  | Sc    | C <sub>1</sub> N <sub>2</sub> | -2.22 | 3.76 | -2.15 |
| 28  | Ti    | C <sub>1</sub> N <sub>2</sub> | -1.80 | 3.20 | -1.88 |
| 29  | V     | C <sub>1</sub> N <sub>2</sub> | -1.20 | 2.92 | -1.27 |
| 30  | Cr    | C <sub>1</sub> N <sub>2</sub> | -0.65 | 2.82 | -0.57 |
| 31  | Mn    | C <sub>1</sub> N <sub>2</sub> | -0.67 | 2.65 | -0.77 |
| 32  | Fe    | C <sub>1</sub> N <sub>2</sub> | -0.34 | 2.76 | -0.44 |
| 33  | Co    | C <sub>1</sub> N <sub>2</sub> | -0.13 | 2.70 | -0.26 |
| 34  | Ni    | C <sub>1</sub> N <sub>2</sub> | -0.18 | 2.76 | -0.18 |
| 35  | Cu    | C <sub>1</sub> N <sub>2</sub> | -0.07 | 2.53 | -0.06 |
| 36  | Zn    | C <sub>1</sub> N <sub>2</sub> | -0.25 | 2.47 | -0.22 |
| 37  | Y     | C <sub>1</sub> N <sub>2</sub> | -2.22 | 3.79 | -2.02 |
| 38  | Zr    | C <sub>1</sub> N <sub>2</sub> | -1.75 | 3.18 | -1.71 |
| 39  | Nb    | C <sub>1</sub> N <sub>2</sub> | -1.12 | 3.35 | -1.20 |
| 40  | Mo    | C <sub>1</sub> N <sub>2</sub> | -0.45 | 3.02 | -0.49 |
| 41  | Tc    | C <sub>1</sub> N <sub>2</sub> | -0.31 | 3.00 | -0.27 |
| 42  | Ru    | C <sub>1</sub> N <sub>2</sub> | -0.08 | 2.53 | -0.07 |
| 43  | Rh    | C <sub>1</sub> N <sub>2</sub> | -0.12 | 2.49 | -0.09 |
| 44  | Pd    | C <sub>1</sub> N <sub>2</sub> | -0.05 | 2.72 | -0.01 |
| 45  | Cd    | C <sub>1</sub> N <sub>2</sub> | -0.26 | 2.48 | -0.10 |
| 46  | Hf    | C <sub>1</sub> N <sub>2</sub> | -1.85 | 3.39 | -1.82 |
| 47  | Ta    | C <sub>1</sub> N <sub>2</sub> | -1.57 | 3.06 | -1.60 |
| 48  | W     | C <sub>1</sub> N <sub>2</sub> | -0.68 | 3.29 | -0.87 |

| Num | Metal | Base          | ORR   | OER  | HER   |
|-----|-------|---------------|-------|------|-------|
| 49  | Re    | C1N2          | -0.59 | 2.72 | -0.44 |
| 50  | Os    | C1N2          | -0.18 | 2.88 | -0.28 |
| 51  | Ir    | C1N2          | -0.08 | 2.62 | -0.06 |
| 52  | Pt    | C1N2          | -0.04 | 2.59 | 0.02  |
| 53  | Sc    | N3            | -2.15 | 3.72 | -2.17 |
| 54  | Ti    | N3            | -1.80 | 3.26 | -1.86 |
| 55  | V     | N3            | -1.22 | 3.03 | -1.29 |
| 56  | Cr    | N3            | -0.62 | 3.32 | -0.48 |
| 57  | Mn    | N3            | -0.64 | 2.85 | -0.62 |
| 58  | Fe    | N3            | -0.24 | 2.39 | -0.34 |
| 59  | Co    | N3            | -0.05 | 1.93 | -0.18 |
| 60  | Ni    | N3            | 0.00  | 1.86 | -0.08 |
| 61  | Cu    | N3            | 0.19  | 1.89 | 0.11  |
| 62  | Zn    | N3            | 0.03  | 2.03 | -0.02 |
| 63  | Y     | N3            | -2.13 | 3.67 | -2.02 |
| 64  | Zr    | N3            | -1.71 | 3.23 | -1.67 |
| 65  | Nb    | N3            | -1.17 | 3.25 | -1.24 |
| 66  | Mo    | N3            | -0.51 | 3.25 | -0.51 |
| 67  | Tc    | N3            | -0.22 | 2.83 | -0.26 |
| 68  | Ru    | N3            | -0.06 | 2.09 | -0.04 |
| 69  | Rh    | N3            | -0.03 | 1.99 | 0.02  |
| 70  | Pd    | N3            | 0.10  | 2.34 | 0.16  |
| 71  | Cd    | N3            | 0.10  | 2.03 | 0.11  |
| 72  | Hf    | N3            | -1.83 | 3.25 | -1.78 |
| 73  | Ta    | N3            | -1.57 | 3.13 | -1.59 |
| 74  | W     | N3            | -0.75 | 3.36 | -0.93 |
| 75  | Re    | N3            | -0.67 | 3.45 | -0.45 |
| 76  | Os    | N3            | -0.16 | 2.56 | -0.27 |
| 77  | Ir    | N3            | -0.07 | 2.16 | -0.05 |
| 78  | Pt    | N3            | 0.05  | 2.25 | 0.06  |
| 79  | Sc    | pyridine-C3N1 | -2.16 | 3.73 | -2.11 |
| 80  | Ti    | pyridine-C3N1 | -1.57 | 3.17 | -1.56 |
| 81  | V     | pyridine-C3N1 | -1.12 | 3.02 | -1.19 |
| 82  | Cr    | pyridine-C3N1 | -0.60 | 3.13 | -0.58 |
| 83  | Mn    | pyridine-C3N1 | -0.48 | 2.73 | -0.47 |
| 84  | Fe    | pyridine-C3N1 | 0.12  | 2.50 | 0.29  |
| 85  | Co    | pyridine-C3N1 | 0.31  | 2.04 | 0.36  |
| 86  | Ni    | pyridine-C3N1 | 0.41  | 2.06 | 0.49  |
| 87  | Cu    | pyridine-C3N1 | 0.50  | 2.13 | 0.56  |
| 88  | Zn    | pyridine-C3N1 | 0.34  | 2.16 | 0.39  |
| 89  | Y     | pyridine-C3N1 | -2.17 | 3.81 | -1.97 |
| 90  | Zr    | pyridine-C3N1 | -1.57 | 3.23 | -1.60 |
| 91  | Nb    | pyridine-C3N1 | -1.03 | 3.25 | -1.05 |

| Num | Metal | Base                                   | ORR   | OER  | HER   |
|-----|-------|----------------------------------------|-------|------|-------|
| 92  | Mo    | pyridine-C <sub>3</sub> N <sub>1</sub> | -0.43 | 3.06 | -0.50 |
| 93  | Tc    | pyridine-C <sub>3</sub> N <sub>1</sub> | 0.10  | 2.75 | 0.05  |
| 94  | Ru    | pyridine-C <sub>3</sub> N <sub>1</sub> | 0.27  | 2.19 | 0.36  |
| 95  | Rh    | pyridine-C <sub>3</sub> N <sub>1</sub> | 0.38  | 2.16 | 0.54  |
| 96  | Pd    | pyridine-C <sub>3</sub> N <sub>1</sub> | 0.45  | 2.49 | 0.30  |
| 97  | Cd    | pyridine-C <sub>3</sub> N <sub>1</sub> | 0.28  | 2.34 | 0.33  |
| 98  | Hf    | pyridine-C <sub>3</sub> N <sub>1</sub> | -1.56 | 3.29 | -1.57 |
| 99  | Ta    | pyridine-C <sub>3</sub> N <sub>1</sub> | -1.32 | 3.09 | -1.31 |
| 100 | W     | pyridine-C <sub>3</sub> N <sub>1</sub> | -0.82 | 3.32 | -0.87 |
| 101 | Re    | pyridine-C <sub>3</sub> N <sub>1</sub> | -0.64 | 2.97 | -0.48 |
| 102 | Os    | pyridine-C <sub>3</sub> N <sub>1</sub> | 0.18  | 2.54 | 0.19  |
| 103 | Ir    | pyridine-C <sub>3</sub> N <sub>1</sub> | 0.27  | 2.24 | 0.30  |
| 104 | Pt    | pyridine-C <sub>3</sub> N <sub>1</sub> | 0.41  | 2.22 | 0.61  |
| 105 | Sc    | pyridine-C <sub>2</sub> N <sub>2</sub> | -2.20 | 3.73 | -2.11 |
| 106 | Ti    | pyridine-C <sub>2</sub> N <sub>2</sub> | -1.56 | 3.17 | -1.54 |
| 107 | V     | pyridine-C <sub>2</sub> N <sub>2</sub> | -0.98 | 3.02 | -1.12 |
| 108 | Cr    | pyridine-C <sub>2</sub> N <sub>2</sub> | -0.15 | 3.13 | -0.14 |
| 109 | Mn    | pyridine-C <sub>2</sub> N <sub>2</sub> | -0.11 | 2.73 | -0.28 |
| 110 | Fe    | pyridine-C <sub>2</sub> N <sub>2</sub> | 0.31  | 2.50 | 0.47  |
| 111 | Co    | pyridine-C <sub>2</sub> N <sub>2</sub> | 0.38  | 2.04 | 0.44  |
| 112 | Ni    | pyridine-C <sub>2</sub> N <sub>2</sub> | 0.23  | 2.06 | 0.20  |
| 113 | Cu    | pyridine-C <sub>2</sub> N <sub>2</sub> | 0.04  | 2.13 | 0.05  |
| 114 | Zn    | pyridine-C <sub>2</sub> N <sub>2</sub> | -0.21 | 2.16 | -0.29 |
| 115 | Y     | pyridine-C <sub>2</sub> N <sub>2</sub> | -2.20 | 3.81 | -1.97 |
| 116 | Zr    | pyridine-C <sub>2</sub> N <sub>2</sub> | -1.59 | 3.23 | -1.57 |
| 117 | Nb    | pyridine-C <sub>2</sub> N <sub>2</sub> | -0.83 | 3.25 | -0.82 |
| 118 | Mo    | pyridine-C <sub>2</sub> N <sub>2</sub> | 0.02  | 3.06 | -0.01 |
| 119 | Tc    | pyridine-C <sub>2</sub> N <sub>2</sub> | 0.30  | 2.75 | 0.24  |
| 120 | Ru    | pyridine-C <sub>2</sub> N <sub>2</sub> | 0.26  | 2.19 | 0.38  |
| 121 | Rh    | pyridine-C <sub>2</sub> N <sub>2</sub> | 0.07  | 2.16 | 0.18  |
| 122 | Pd    | pyridine-C <sub>2</sub> N <sub>2</sub> | -0.11 | 2.49 | -0.37 |
| 123 | Cd    | pyridine-C <sub>2</sub> N <sub>2</sub> | -0.26 | 2.34 | -0.36 |
| 124 | Hf    | pyridine-C <sub>2</sub> N <sub>2</sub> | -1.58 | 3.29 | -1.59 |
| 125 | Ta    | pyridine-C <sub>2</sub> N <sub>2</sub> | -1.26 | 3.09 | -1.24 |
| 126 | W     | pyridine-C <sub>2</sub> N <sub>2</sub> | -0.55 | 3.32 | -0.61 |
| 127 | Re    | pyridine-C <sub>2</sub> N <sub>2</sub> | -0.16 | 2.97 | 0.01  |
| 128 | Os    | pyridine-C <sub>2</sub> N <sub>2</sub> | 0.24  | 2.54 | 0.39  |
| 129 | Ir    | pyridine-C <sub>2</sub> N <sub>2</sub> | 0.26  | 2.24 | 0.39  |
| 130 | Pt    | pyridine-C <sub>2</sub> N <sub>2</sub> | -0.04 | 2.22 | 0.25  |
| 131 | Sc    | pyridine-C <sub>1</sub> N <sub>3</sub> | -2.26 | 3.73 | -2.11 |
| 132 | Ti    | pyridine-C <sub>1</sub> N <sub>3</sub> | -1.54 | 3.13 | -1.52 |
| 133 | V     | pyridine-C <sub>1</sub> N <sub>3</sub> | -0.86 | 2.83 | -1.03 |
| 134 | Cr    | pyridine-C <sub>1</sub> N <sub>3</sub> | 0.28  | 2.60 | 0.25  |

| Num | Metal | Base                                   | ORR   | OER  | HER   |
|-----|-------|----------------------------------------|-------|------|-------|
| 135 | Mn    | pyridine-C <sub>1</sub> N <sub>3</sub> | 0.30  | 2.46 | -0.05 |
| 136 | Fe    | pyridine-C <sub>1</sub> N <sub>3</sub> | 0.55  | 2.04 | 0.64  |
| 137 | Co    | pyridine-C <sub>1</sub> N <sub>3</sub> | 0.47  | 1.66 | 0.54  |
| 138 | Ni    | pyridine-C <sub>1</sub> N <sub>3</sub> | 0.03  | 1.94 | -0.03 |
| 139 | Cu    | pyridine-C <sub>1</sub> N <sub>3</sub> | -0.44 | 2.32 | -0.36 |
| 140 | Zn    | pyridine-C <sub>1</sub> N <sub>3</sub> | -0.81 | 2.65 | -0.83 |
| 141 | Y     | pyridine-C <sub>1</sub> N <sub>3</sub> | -2.25 | 3.98 | -1.97 |
| 142 | Zr    | pyridine-C <sub>1</sub> N <sub>3</sub> | -1.62 | 3.19 | -1.54 |
| 143 | Nb    | pyridine-C <sub>1</sub> N <sub>3</sub> | -0.58 | 3.43 | -0.58 |
| 144 | Mo    | pyridine-C <sub>1</sub> N <sub>3</sub> | 0.44  | 2.51 | 0.41  |
| 145 | Tc    | pyridine-C <sub>1</sub> N <sub>3</sub> | 0.55  | 2.41 | 0.46  |
| 146 | Ru    | pyridine-C <sub>1</sub> N <sub>3</sub> | 0.25  | 1.69 | 0.38  |
| 147 | Rh    | pyridine-C <sub>1</sub> N <sub>3</sub> | -0.28 | 2.04 | -0.12 |
| 148 | Pd    | pyridine-C <sub>1</sub> N <sub>3</sub> | -0.67 | 2.99 | -0.97 |
| 149 | Cd    | pyridine-C <sub>1</sub> N <sub>3</sub> | -0.92 | 2.88 | -0.93 |
| 150 | Hf    | pyridine-C <sub>1</sub> N <sub>3</sub> | -1.60 | 3.35 | -1.59 |
| 151 | Ta    | pyridine-C <sub>1</sub> N <sub>3</sub> | -1.17 | 2.86 | -1.18 |
| 152 | W     | pyridine-C <sub>1</sub> N <sub>3</sub> | -0.29 | 3.45 | -0.32 |
| 153 | Re    | pyridine-C <sub>1</sub> N <sub>3</sub> | 0.30  | 2.37 | 0.46  |
| 154 | Os    | pyridine-C <sub>1</sub> N <sub>3</sub> | 0.30  | 1.96 | 0.60  |
| 155 | Ir    | pyridine-C <sub>1</sub> N <sub>3</sub> | 0.25  | 1.64 | 0.47  |
| 156 | Pt    | pyridine-C <sub>1</sub> N <sub>3</sub> | -0.50 | 2.28 | -0.07 |
| 157 | Sc    | pyrrole-C <sub>4</sub>                 | -2.22 | 3.72 | -2.11 |
| 158 | Ti    | pyrrole-C <sub>4</sub>                 | -1.55 | 3.17 | -1.54 |
| 159 | V     | pyrrole-C <sub>4</sub>                 | -1.00 | 3.00 | -1.11 |
| 160 | Cr    | pyrrole-C <sub>4</sub>                 | -0.16 | 3.08 | -0.18 |
| 161 | Mn    | pyrrole-C <sub>4</sub>                 | -0.07 | 2.68 | -0.24 |
| 162 | Fe    | pyrrole-C <sub>4</sub>                 | 0.36  | 2.40 | 0.46  |
| 163 | Co    | pyrrole-C <sub>4</sub>                 | 0.40  | 1.97 | 0.47  |
| 164 | Ni    | pyrrole-C <sub>4</sub>                 | 0.21  | 2.02 | 0.26  |
| 165 | Cu    | pyrrole-C <sub>4</sub>                 | 0.02  | 2.15 | 0.14  |
| 166 | Zn    | pyrrole-C <sub>4</sub>                 | -0.26 | 2.27 | -0.16 |
| 167 | Y     | pyrrole-C <sub>4</sub>                 | -2.22 | 3.83 | -1.97 |
| 168 | Zr    | pyrrole-C <sub>4</sub>                 | -1.59 | 3.24 | -1.57 |
| 169 | Nb    | pyrrole-C <sub>4</sub>                 | -0.78 | 3.26 | -0.81 |
| 170 | Mo    | pyrrole-C <sub>4</sub>                 | -0.01 | 2.99 | -0.08 |
| 171 | Tc    | pyrrole-C <sub>4</sub>                 | 0.34  | 2.71 | 0.27  |
| 172 | Ru    | pyrrole-C <sub>4</sub>                 | 0.26  | 2.14 | 0.36  |
| 173 | Rh    | pyrrole-C <sub>4</sub>                 | 0.03  | 2.14 | 0.25  |
| 174 | Pd    | pyrrole-C <sub>4</sub>                 | -0.11 | 2.58 | -0.30 |
| 175 | Cd    | pyrrole-C <sub>4</sub>                 | -0.38 | 2.45 | -0.23 |
| 176 | Hf    | pyrrole-C <sub>4</sub>                 | -1.58 | 3.28 | -1.58 |
| 177 | Ta    | pyrrole-C <sub>4</sub>                 | -1.24 | 3.03 | -1.25 |

| Num | Metal | Base         | ORR   | OER  | HER   |
|-----|-------|--------------|-------|------|-------|
| 178 | W     | pyrrole-C4   | -0.55 | 3.34 | -0.59 |
| 179 | Re    | pyrrole-C4   | -0.18 | 2.92 | -0.03 |
| 180 | Os    | pyrrole-C4   | 0.25  | 2.42 | 0.40  |
| 181 | Ir    | pyrrole-C4   | 0.27  | 2.13 | 0.38  |
| 182 | Pt    | pyrrole-C4   | -0.05 | 2.23 | 0.30  |
| 183 | Sc    | pyrrole-C3N1 | -2.22 | 3.73 | -2.11 |
| 184 | Ti    | pyrrole-C3N1 | -1.55 | 3.13 | -1.54 |
| 185 | V     | pyrrole-C3N1 | -1.00 | 2.83 | -1.11 |
| 186 | Cr    | pyrrole-C3N1 | -0.16 | 2.60 | -0.18 |
| 187 | Mn    | pyrrole-C3N1 | -0.07 | 2.46 | -0.24 |
| 188 | Fe    | pyrrole-C3N1 | 0.36  | 2.04 | 0.46  |
| 189 | Co    | pyrrole-C3N1 | 0.40  | 1.66 | 0.47  |
| 190 | Ni    | pyrrole-C3N1 | 0.21  | 1.94 | 0.26  |
| 191 | Cu    | pyrrole-C3N1 | 0.02  | 2.32 | 0.14  |
| 192 | Zn    | pyrrole-C3N1 | -0.26 | 2.65 | -0.16 |
| 193 | Y     | pyrrole-C3N1 | -2.22 | 3.98 | -1.97 |
| 194 | Zr    | pyrrole-C3N1 | -1.59 | 3.19 | -1.57 |
| 195 | Nb    | pyrrole-C3N1 | -0.78 | 3.43 | -0.81 |
| 196 | Mo    | pyrrole-C3N1 | -0.01 | 2.51 | -0.08 |
| 197 | Tc    | pyrrole-C3N1 | 0.34  | 2.41 | 0.27  |
| 198 | Ru    | pyrrole-C3N1 | 0.26  | 1.69 | 0.36  |
| 199 | Rh    | pyrrole-C3N1 | 0.03  | 2.04 | 0.25  |
| 200 | Pd    | pyrrole-C3N1 | -0.11 | 2.99 | -0.30 |
| 201 | Cd    | pyrrole-C3N1 | -0.38 | 2.88 | -0.23 |
| 202 | Hf    | pyrrole-C3N1 | -1.58 | 3.35 | -1.58 |
| 203 | Ta    | pyrrole-C3N1 | -1.24 | 2.86 | -1.25 |
| 204 | W     | pyrrole-C3N1 | -0.55 | 3.45 | -0.59 |
| 205 | Re    | pyrrole-C3N1 | -0.18 | 2.37 | -0.03 |
| 206 | Os    | pyrrole-C3N1 | 0.25  | 1.96 | 0.40  |
| 207 | Ir    | pyrrole-C3N1 | 0.27  | 1.64 | 0.38  |
| 208 | Pt    | pyrrole-C3N1 | -0.05 | 2.28 | 0.30  |
| 209 | Sc    | pyrrole-C2N2 | -2.26 | 3.73 | -2.11 |
| 210 | Ti    | pyrrole-C2N2 | -1.54 | 3.13 | -1.52 |
| 211 | V     | pyrrole-C2N2 | -0.86 | 2.83 | -1.03 |
| 212 | Cr    | pyrrole-C2N2 | 0.28  | 2.60 | 0.25  |
| 213 | Mn    | pyrrole-C2N2 | 0.30  | 2.46 | -0.05 |
| 214 | Fe    | pyrrole-C2N2 | 0.55  | 2.04 | 0.64  |
| 215 | Co    | pyrrole-C2N2 | 0.47  | 1.66 | 0.54  |
| 216 | Ni    | pyrrole-C2N2 | 0.03  | 1.94 | -0.03 |
| 217 | Cu    | pyrrole-C2N2 | -0.44 | 2.32 | -0.36 |
| 218 | Zn    | pyrrole-C2N2 | -0.81 | 2.65 | -0.83 |
| 219 | Y     | pyrrole-C2N2 | -2.25 | 3.98 | -1.97 |
| 220 | Zr    | pyrrole-C2N2 | -1.62 | 3.19 | -1.54 |



| Num | Metal | Base                                  | ORR   | OER  | HER   |
|-----|-------|---------------------------------------|-------|------|-------|
| 221 | Nb    | pyrrole-C <sub>2</sub> N <sub>2</sub> | -0.58 | 3.43 | -0.58 |
| 222 | Mo    | pyrrole-C <sub>2</sub> N <sub>2</sub> | 0.44  | 2.51 | 0.41  |
| 223 | Tc    | pyrrole-C <sub>2</sub> N <sub>2</sub> | 0.55  | 2.41 | 0.46  |
| 224 | Ru    | pyrrole-C <sub>2</sub> N <sub>2</sub> | 0.25  | 1.69 | 0.38  |
| 225 | Rh    | pyrrole-C <sub>2</sub> N <sub>2</sub> | -0.28 | 2.04 | -0.12 |
| 226 | Pd    | pyrrole-C <sub>2</sub> N <sub>2</sub> | -0.67 | 2.99 | -0.97 |
| 227 | Cd    | pyrrole-C <sub>2</sub> N <sub>2</sub> | -0.92 | 2.88 | -0.93 |
| 228 | Hf    | pyrrole-C <sub>2</sub> N <sub>2</sub> | -1.60 | 3.35 | -1.59 |
| 229 | Ta    | pyrrole-C <sub>2</sub> N <sub>2</sub> | -1.17 | 2.86 | -1.18 |
| 230 | W     | pyrrole-C <sub>2</sub> N <sub>2</sub> | -0.29 | 3.45 | -0.32 |
| 231 | Re    | pyrrole-C <sub>2</sub> N <sub>2</sub> | 0.30  | 2.37 | 0.46  |
| 232 | Os    | pyrrole-C <sub>2</sub> N <sub>2</sub> | 0.30  | 1.96 | 0.60  |
| 233 | Ir    | pyrrole-C <sub>2</sub> N <sub>2</sub> | 0.25  | 1.64 | 0.47  |
| 234 | Pt    | pyrrole-C <sub>2</sub> N <sub>2</sub> | -0.50 | 2.28 | -0.07 |
| 235 | Sc    | pyrrole-C <sub>1</sub> N <sub>3</sub> | -2.26 | 3.73 | -2.11 |
| 236 | Ti    | pyrrole-C <sub>1</sub> N <sub>3</sub> | -1.54 | 3.13 | -1.52 |
| 237 | V     | pyrrole-C <sub>1</sub> N <sub>3</sub> | -0.86 | 2.83 | -1.03 |
| 238 | Cr    | pyrrole-C <sub>1</sub> N <sub>3</sub> | 0.28  | 2.60 | 0.25  |
| 239 | Mn    | pyrrole-C <sub>1</sub> N <sub>3</sub> | 0.30  | 2.46 | -0.05 |
| 240 | Fe    | pyrrole-C <sub>1</sub> N <sub>3</sub> | 0.55  | 2.04 | 0.64  |
| 241 | Co    | pyrrole-C <sub>1</sub> N <sub>3</sub> | 0.47  | 1.66 | 0.54  |
| 242 | Ni    | pyrrole-C <sub>1</sub> N <sub>3</sub> | 0.03  | 1.94 | -0.03 |
| 243 | Cu    | pyrrole-C <sub>1</sub> N <sub>3</sub> | -0.44 | 2.32 | -0.36 |
| 244 | Zn    | pyrrole-C <sub>1</sub> N <sub>3</sub> | -0.81 | 2.65 | -0.83 |
| 245 | Y     | pyrrole-C <sub>1</sub> N <sub>3</sub> | -2.25 | 3.98 | -1.97 |
| 246 | Zr    | pyrrole-C <sub>1</sub> N <sub>3</sub> | -1.62 | 3.19 | -1.54 |
| 247 | Nb    | pyrrole-C <sub>1</sub> N <sub>3</sub> | -0.58 | 3.43 | -0.58 |
| 248 | Mo    | pyrrole-C <sub>1</sub> N <sub>3</sub> | 0.44  | 2.51 | 0.41  |
| 249 | Tc    | pyrrole-C <sub>1</sub> N <sub>3</sub> | 0.55  | 2.41 | 0.46  |
| 250 | Ru    | pyrrole-C <sub>1</sub> N <sub>3</sub> | 0.25  | 1.69 | 0.38  |
| 251 | Rh    | pyrrole-C <sub>1</sub> N <sub>3</sub> | -0.28 | 2.04 | -0.12 |
| 252 | Pd    | pyrrole-C <sub>1</sub> N <sub>3</sub> | -0.67 | 2.99 | -0.97 |
| 253 | Cd    | pyrrole-C <sub>1</sub> N <sub>3</sub> | -0.92 | 2.88 | -0.93 |
| 254 | Hf    | pyrrole-C <sub>1</sub> N <sub>3</sub> | -1.60 | 3.35 | -1.59 |
| 255 | Ta    | pyrrole-C <sub>1</sub> N <sub>3</sub> | -1.17 | 2.86 | -1.18 |
| 256 | W     | pyrrole-C <sub>1</sub> N <sub>3</sub> | -0.29 | 3.45 | -0.32 |
| 257 | Re    | pyrrole-C <sub>1</sub> N <sub>3</sub> | 0.30  | 2.37 | 0.46  |
| 258 | Os    | pyrrole-C <sub>1</sub> N <sub>3</sub> | 0.30  | 1.96 | 0.60  |
| 259 | Ir    | pyrrole-C <sub>1</sub> N <sub>3</sub> | 0.25  | 1.64 | 0.47  |
| 260 | Pt    | pyrrole-C <sub>1</sub> N <sub>3</sub> | -0.50 | 2.28 | -0.07 |

## References

- (1) Nørskov, J. K.; Rossmeisl, J.; Logadottir, A.; Lindqvist, L.; Kitchin, J. R.; Bligaard, T.; Jonsson, H., *J. Phys. Chem. B* **2004**, *108*, 17886-17892.
- (2) Jones, R. O.; Gunnarsson, O., *Rev. Modern Physics* **1989**, *61*, 689.
- (3) Kurth, S.; Perdew, J. P.; Blaha, P., *Int. J. Quantum Chem.* **1999**, *75*, 889-909.
